# Supplementary material
Source: Royal Society of Chemistry journal article supplement (doi:10.1039/d5gc04570c)
Supplement: d5gc04570c1.pdf [file d5gc04570c1.pdf]

## Supplementary Information

### Domino Photoreduction of CO<sub>2</sub> to CH<sub>4</sub>/C<sub>2</sub>H<sub>6</sub> by Steering Catalyst Amounts

Minzhi Ma<sup>[a], [b]\*</sup>, Mengge Jia<sup>[a]</sup>, Shichu Zhao<sup>[a], [c]</sup>, Zhiqiang Jiang<sup>[d]</sup>, Kangle Lv<sup>[d]</sup>, Tongqing Li<sup>[a]</sup>, Helei Chai<sup>[a]</sup>, Yan Lei<sup>[a]</sup>, Jingjing Si<sup>[a]</sup>, Zhi Zheng<sup>[a]</sup>, Wenjun Fa<sup>[a], [c]\*</sup>

[a] Key Laboratory of Micro-Nano Materials for Energy Storage and Conversion of Henan Province, Institute of Surface Micro and Nano Materials, College of Chemical and Materials Engineering, Xuchang University, Xuchang, Henan 461000, China

[b] Key Lab for Special Functional Materials, Ministry of Education, National & Local Joint Engineering Research Center for High-Efficiency Display and Lighting Technology, School of Materials Science and Engineering, Collaborative Innovation Center of Nano Functional Materials and Applications, Henan University, Kaifeng, 475004, China

[c] School of Materials Science and Engineering, Zhengzhou University, Zhengzhou, Henan 450001, China

[d] Key Laboratory of Catalysis and Energy Materials Chemistry of Ministry of Education, College of Resources and Environment, South-Central Minzu University, Wuhan, 430074, China

\* Corresponding authors: Minzhi Ma (Minzhima@yeah.net), Wenjun Fa (fa\_wenjun@163.com)

# Table of contents

|                                                                                   |    |
|-----------------------------------------------------------------------------------|----|
| 1.1 Photocatalytic reaction device .....                                          | 1  |
| 1.2 Technical details of the reactor.....                                         | 2  |
| 1.3 Mixing effect diagram of quartz cotton and catalyst.....                      | 3  |
| 1.4 Internal gas circuit diagram of gas chromatography .....                      | 4  |
| 1.5 Gas chromatography (GC) curves .....                                          | 5  |
| 1.6 The calibration curves .....                                                  | 6  |
| 1.7 UV-vis spectra of the mixtures with different catalysts and quartz wool ..... | 7  |
| 1.8 Yield of CO and H <sub>2</sub> at 180 °C.....                                 | 8  |
| 1.9 Yield of CO and H <sub>2</sub> at 80 °C.....                                  | 9  |
| 1.10 Dependence of product selectivity on catalyst amount at 25 °C .....          | 10 |
| 1.11 Yield of CO <sub>2</sub> reduction products over 4 hours .....               | 11 |
| 1.12 XRD patterns of the reference samples .....                                  | 12 |
| 1.13 SEM images and elemental mapping .....                                       | 13 |
| 1.14 XPS patterns of Ni/CeO <sub>2</sub> .....                                    | 14 |
| 1.15 Electronic structure of the as-prepared catalysts .....                      | 15 |
| 1.16 High-resolution XPS spectra in light.....                                    | 16 |
| 1.17 <i>In situ</i> DRIFTS spectra of Ni/CeO <sub>2</sub> for CO adsorption.....  | 17 |
| 1.18 Compared with the reported work.....                                         | 18 |
| 1.19 References .....                                                             | 19 |

## 1.1 Photocatalytic reaction device

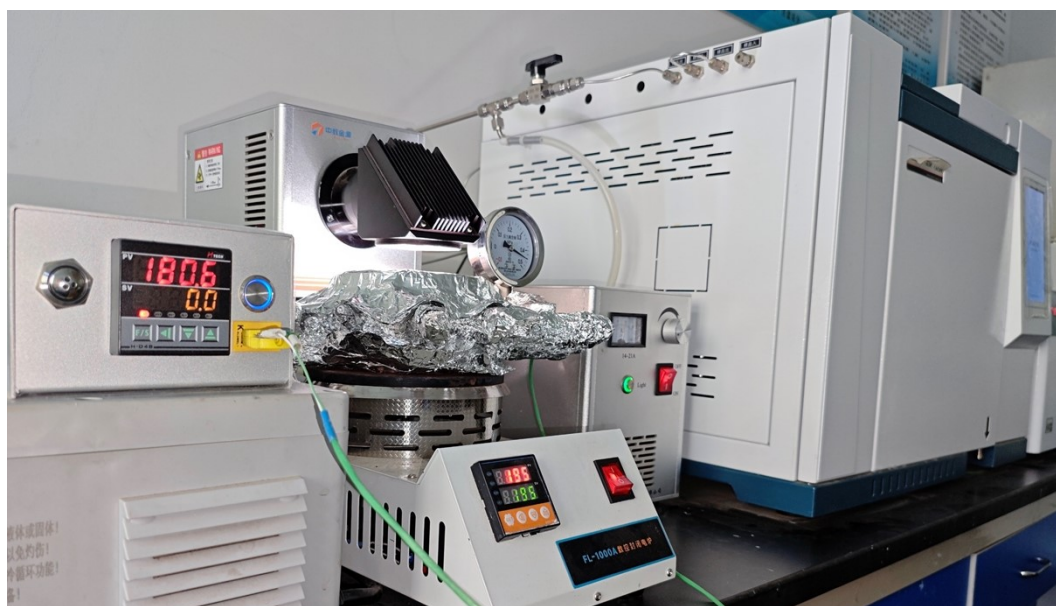

**Figure S1.** Photocatalytic reduction of the CO<sub>2</sub> reaction system.

## 1.2 Technical details of the reactor

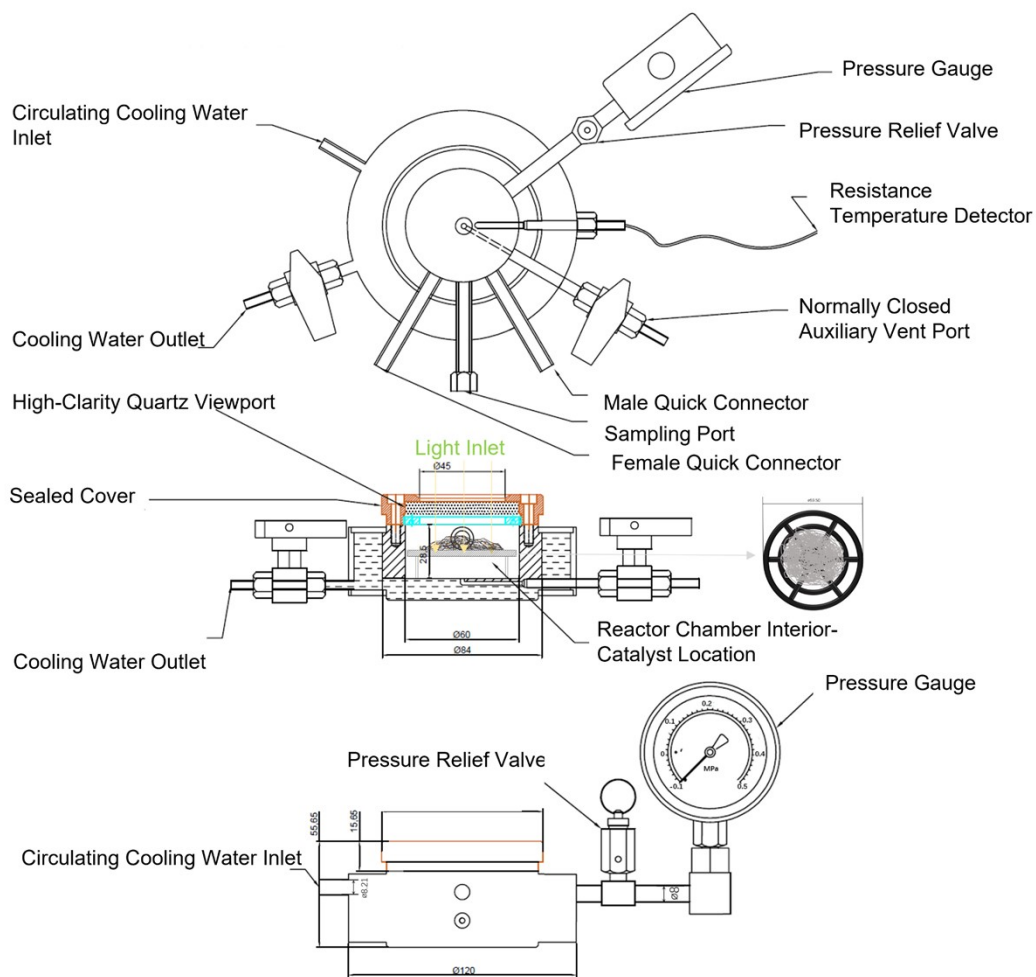

Chamber material: SUS304 (AISI 304) stainless steel. All pipes not otherwise specified have a diameter of 6 mm.

**Figure S2.** Design drawing of the photocatalytic reaction apparatus.

### 1.3 Mixing effect diagram of quartz cotton and catalyst

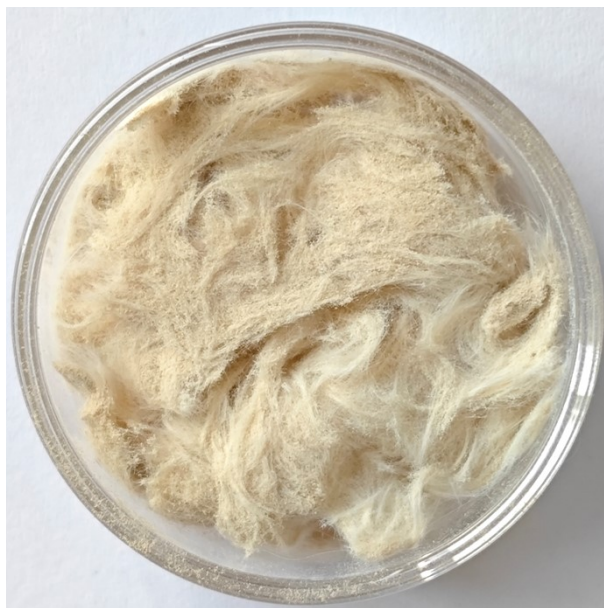

**Figure S3.** Mix 200 mg of quartz cotton with 200 mg of Ni/CeO<sub>2</sub>.

## 1.4 Internal gas circuit diagram of gas chromatography

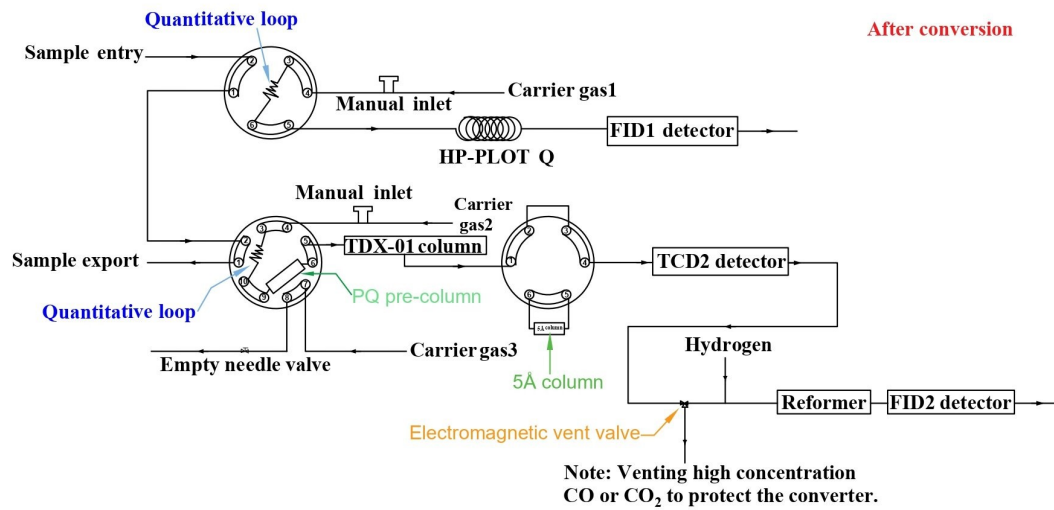

**Figure 4.** Schematic diagram of internal gas flow path of gas chromatography.

## 1.5 Gas chromatography (GC) curves

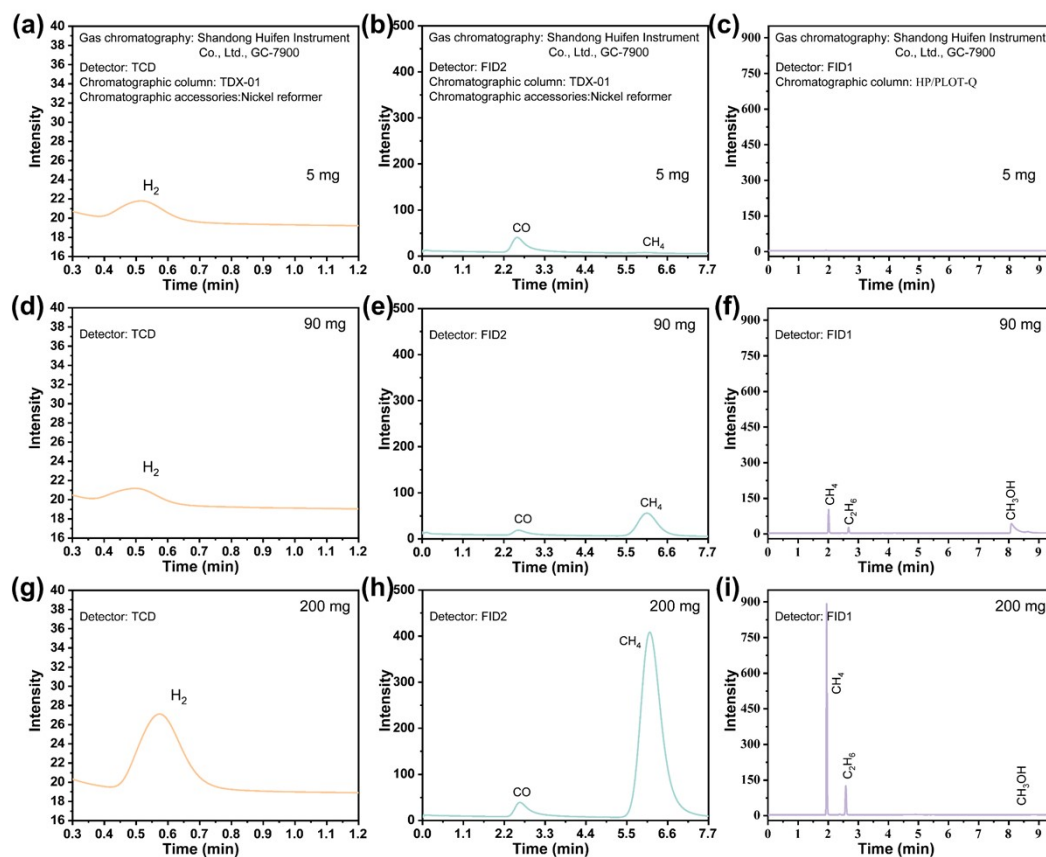

**Figure S5.** Results of GC analysis in the photoreduction of CO<sub>2</sub> reaction for the Ni/CeO<sub>2</sub> with different amount after light irradiation 4 h. 5 mg of (a) TCD, (b) FID2, (c) FID1; 90 mg of (d) TCD, (e) FID2, (f) FID1; 200 mg of (g) TCD, (h) FID2, (i) FID1.

## 1.6 The calibration curves

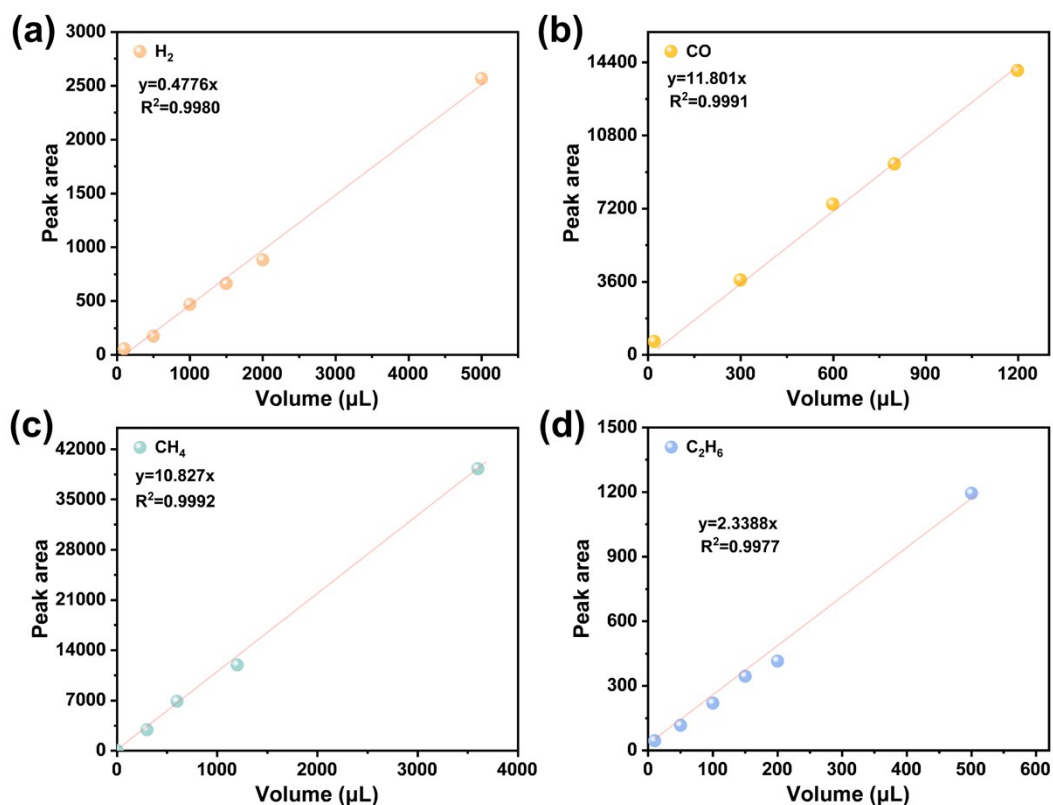

**Figure S6.** Calibration curves of  $\text{CO}_2$  photoreduction products. (a)  $\text{H}_2$ ; (b)  $\text{CO}$ ; (d)  $\text{CH}_4$ ; (e)  $\text{C}_2\text{H}_6$ .

The detailed procedure for calibration is as follows. The yield of products in the reactor was calibrated using the external standard method. The  $\text{H}_2$ ,  $\text{CO}$ ,  $\text{CH}_4$ , and  $\text{C}_2\text{H}_6$  used for calibration were all high-purity standard gases (99.99%). A certain amount of the aforementioned four gases was injected into the reactor, which was at room temperature ( $30\text{ }^\circ\text{C}$ ) and atmospheric pressure. The exact volume used for each calibration gas is shown in **Figure S6**. A gas mixture of 20%  $\text{CO}_2$  in Ar served as the balance gas. Of note, to ensure the consistency between the calibration and testing conditions as much as possible, the calibration gases were used as a mixture for simultaneous calibration, rather than calibrating each gas individually. Subsequently, the temperature and pressure of the reactor were adjusted to be consistent with those used in the standard activity tests. After collecting three data points from the reactor, we cooled and depressurized the system, after which the reactor was opened and cleaned. Finally, the entire procedure described above was repeated three to four times. The mean was calculated from the entire dataset following the exclusion of outliers. The net volume of the reactor was determined to be 80.5 mL by water displacement. The reaction pressure during testing at  $180\text{ }^\circ\text{C}$  was approximately 0.4 MPa. Additionally, the pressure change in the reactor before and after sampling was extremely slight. Gas samples were withdrawn from the reactor using a gas-tight syringe under controlled conditions (the sampling syringe was maintained at  $30\text{ }^\circ\text{C}$  and atmospheric pressure). Through the above procedure, the expression for the correspondence between gas products (volume) and GC peak area can be obtained (**Figure S6**). From the known GC peak areas, the product yields (volume) were determined. The amount of each specific product (in moles) was then calculated using the ideal gas law ( $PV=nRT$ ).

## 1.7 UV-vis spectra of the mixtures with different catalysts and quartz wool

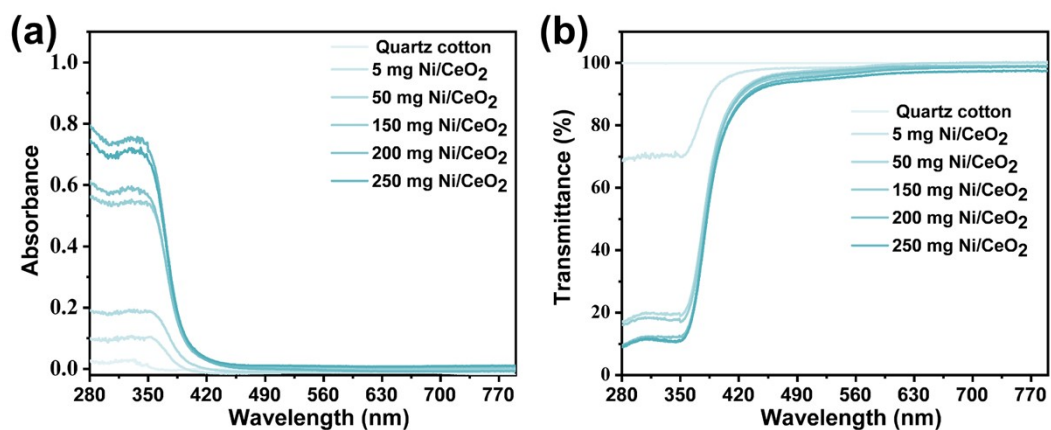

**Figure S7.** UV-vis diffuse reflectance spectra of the catalyst (Ni/CeO<sub>2</sub>) mixed with quartz wool at different loadings. (a) UV-vis absorption spectra of the mixed catalyst/quartz wool samples; (b) UV-vis transmission spectra of the mixed catalyst/quartz wool samples.

## 1.8 Yield of CO and H<sub>2</sub> at 180 °C

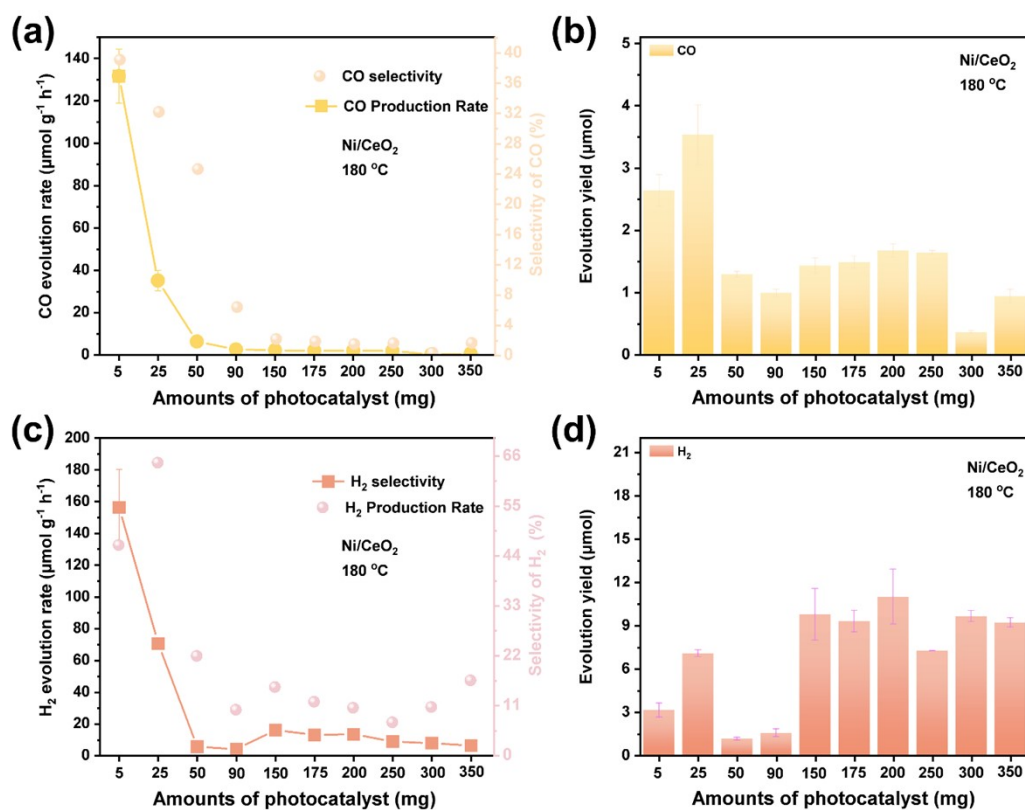

**Figure S8.** Photocatalytic CO<sub>2</sub> reduction performance under light irradiation for 4 h at 180 °C over Ni/CeO<sub>2</sub>. (a) CO evolution rates and selectivities; (b) CO yield; (c) H<sub>2</sub> evolution rates and selectivities; (d) H<sub>2</sub> yield.

## 1.9 Yield of CO and H<sub>2</sub> at 80 °C

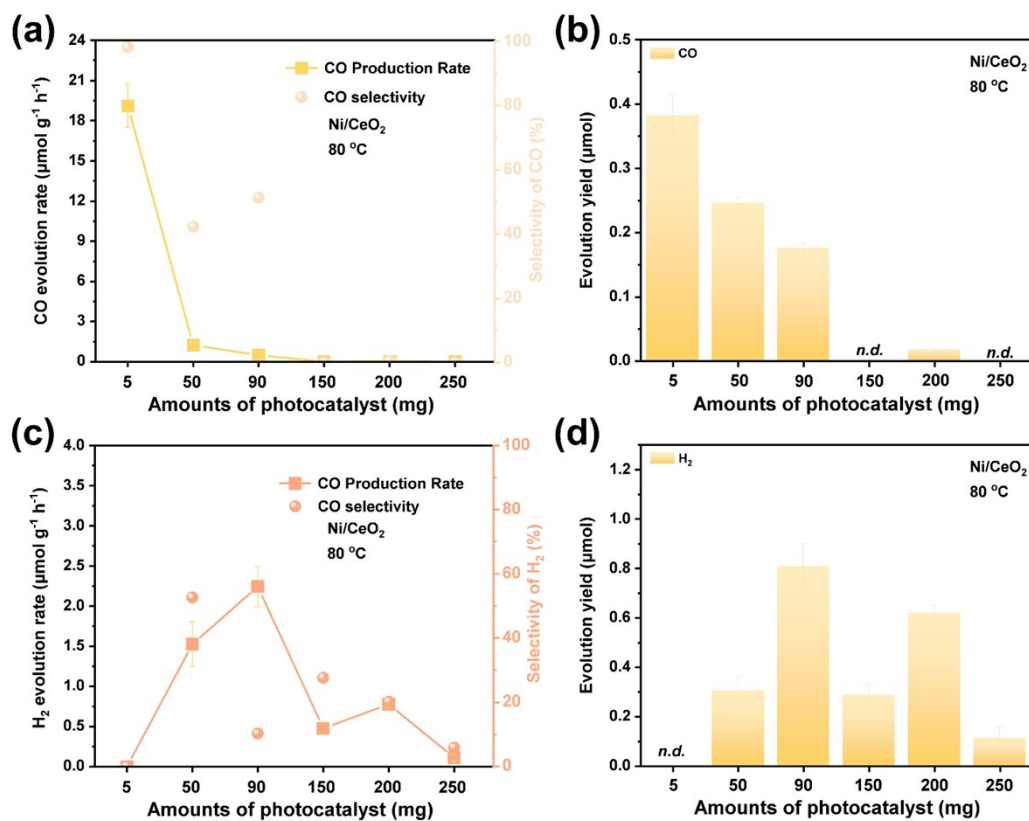

**Figure S9.** Photocatalytic CO<sub>2</sub> reduction performance under light irradiation for 4 h at 80 °C over Ni/CeO<sub>2</sub>. (a) CO evolution rates and selectivities; (b) CO yield; (c) H<sub>2</sub> evolution rates and selectivities; (d) H<sub>2</sub> yield.

## 1.10 Dependence of product selectivity on catalyst amount at 25 °C

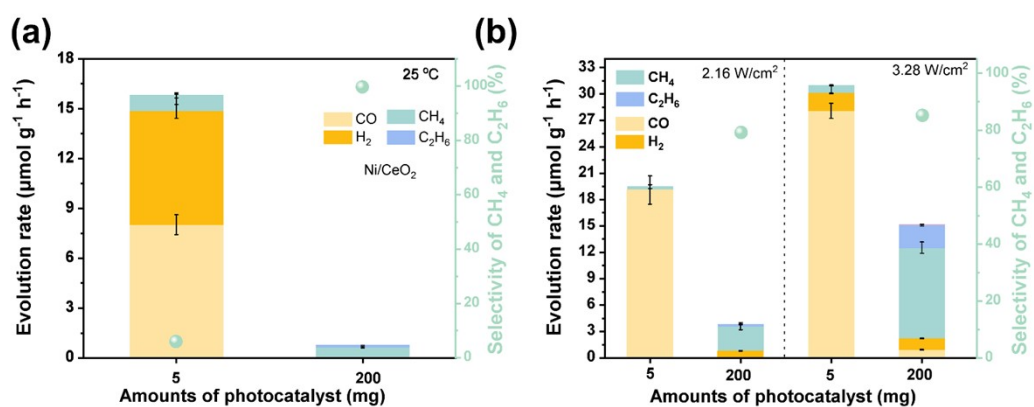

**Figure S10.** Photocatalytic CO<sub>2</sub> reduction performance under light irradiation for 4 h over Ni/CeO<sub>2</sub>. (a) at 25 °C; (b) at different light intensities at 80 °C.

## 1.11 Yield of CO<sub>2</sub> reduction products over 4 hours

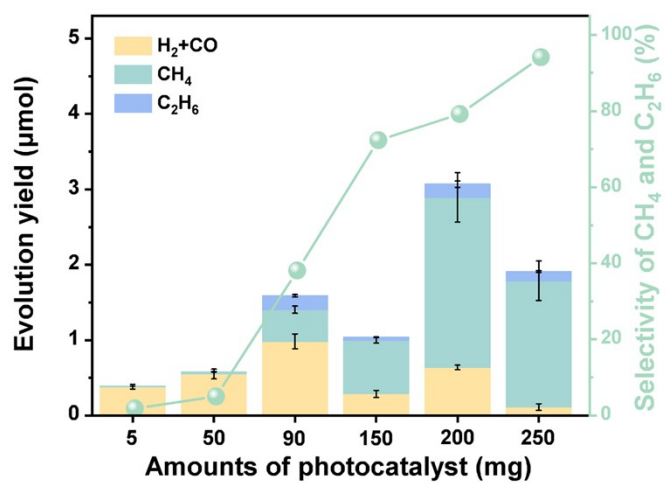

**Figure S11.** Photocatalytic CO<sub>2</sub> reduction performance under light irradiation for 4 h at 80 °C over Ni/CeO<sub>2</sub>.

## 1.12 XRD patterns of the reference samples

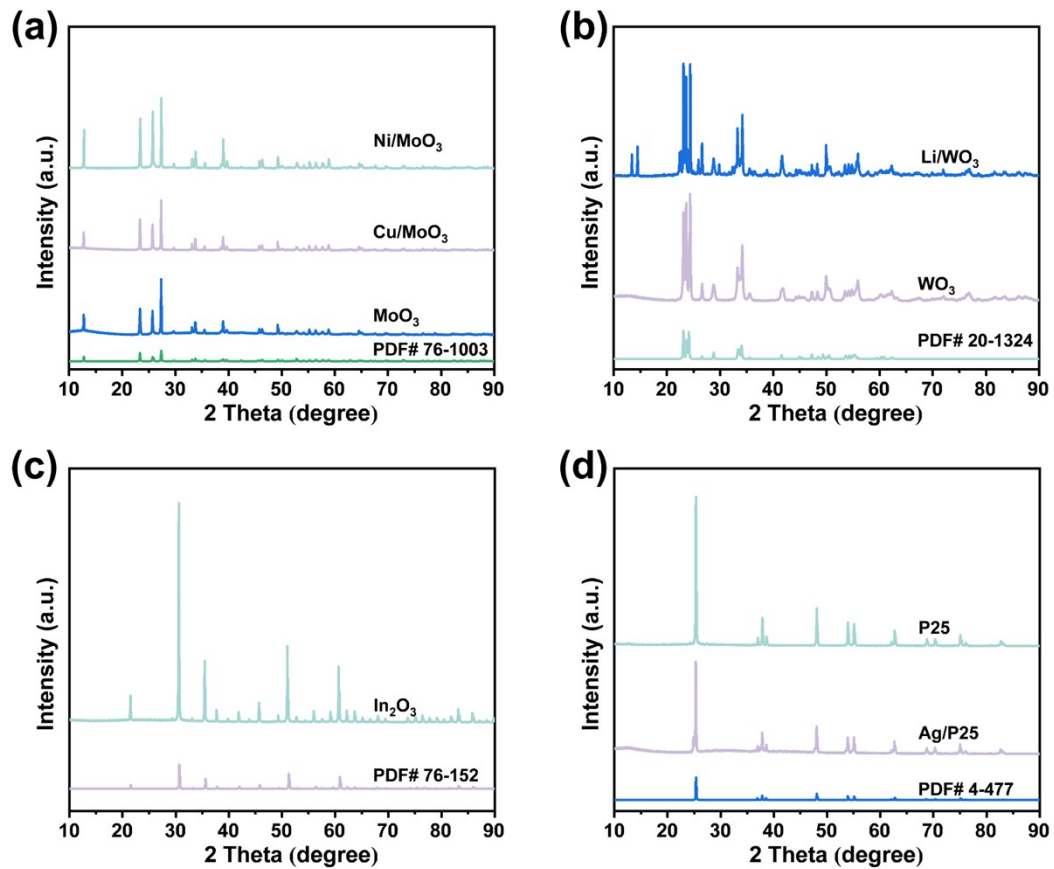

**Figure 12.** XRD pattern of the sample. (a) MoO<sub>3</sub>, Cu/MoO<sub>3</sub>, Ni/MoO<sub>3</sub>; (b) Li/WO<sub>3</sub>, WO<sub>3</sub>; (c) In<sub>2</sub>O<sub>3</sub>; (d) P25, Ag/P25.

### 1.13 SEM images and elemental mapping

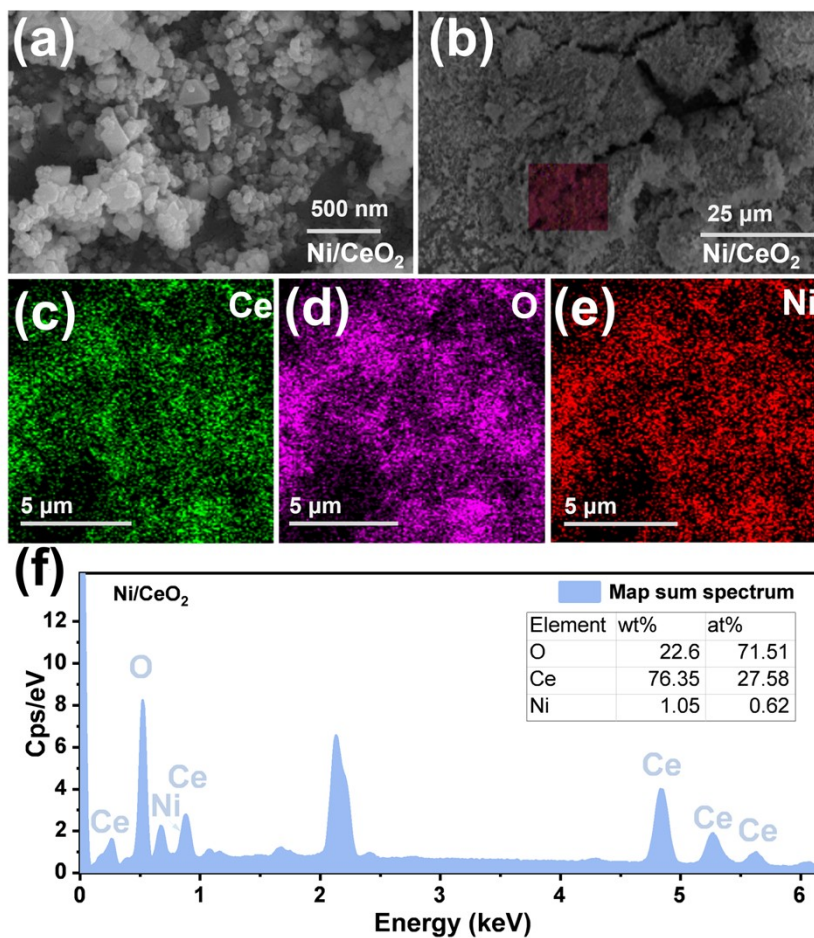

**Figure S13.** SEM images (a–b) and corresponding elemental mapping of (c) Ce, (d) O, (e) Ni, (f) map sum spectrum over the Ni/CeO<sub>2</sub>.

## 1.14 XPS patterns of Ni/CeO<sub>2</sub>

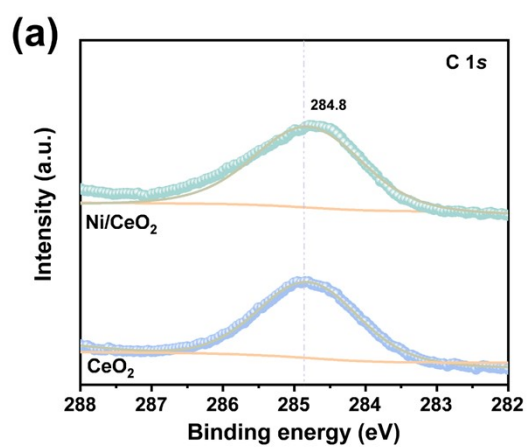

Figure S14. High-resolution XPS spectra of C 1s.

## 1.15 Electronic structure of the as-prepared catalysts

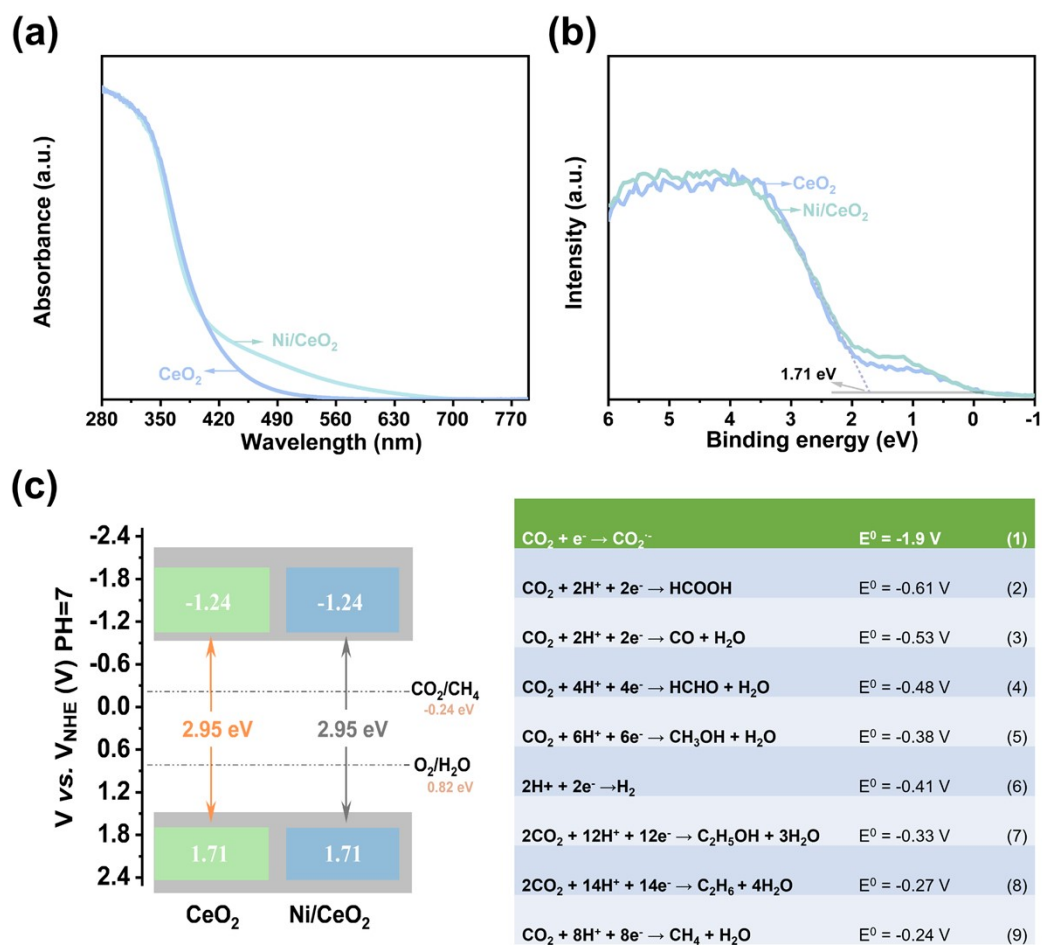

**Figure S15.** Band structure of CeO<sub>2</sub> and Ni/CeO<sub>2</sub>. (a) UV-vis spectra; (b) XPS valance spectra; (c) Band structure.

## 1.16 High-resolution XPS spectra in light

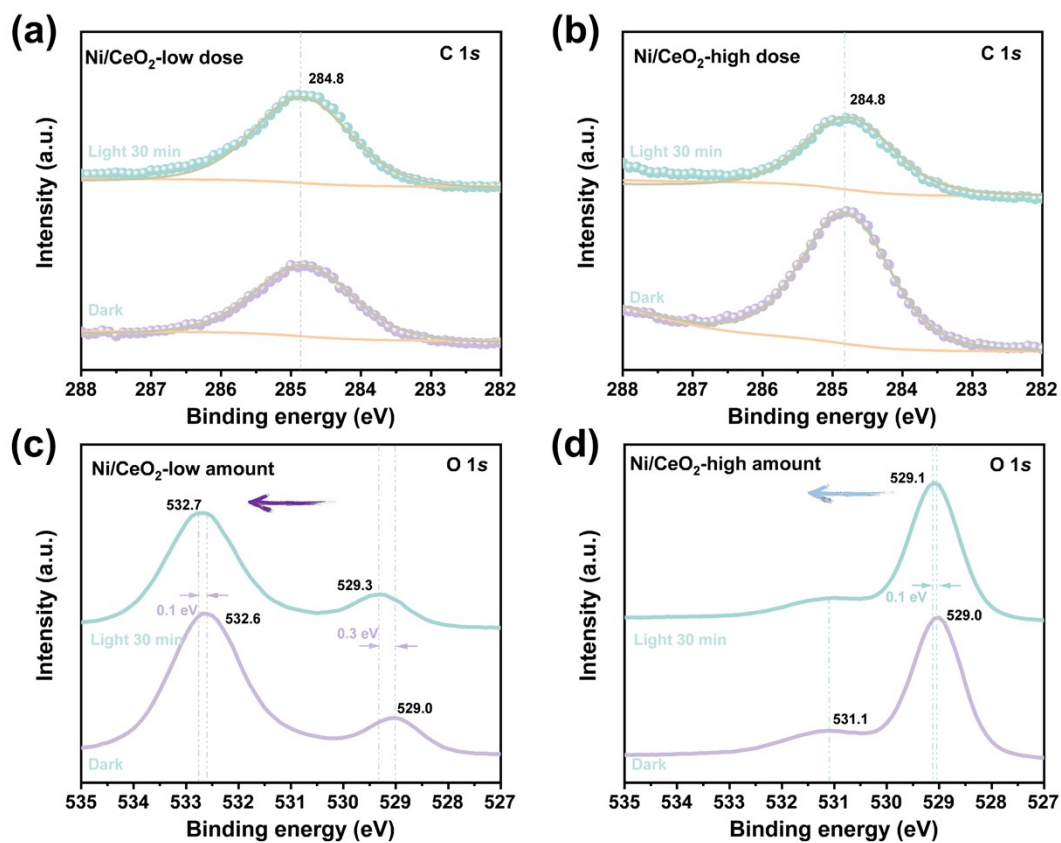

**Figure S16.** High-resolution XPS spectra in light. The C 1s spectra of the Ni/CeO<sub>2</sub>-low amount (a) and the Ni/CeO<sub>2</sub>-high amount (b); The O 1s spectra of the Ni/CeO<sub>2</sub>-low amount (c) and the Ni/CeO<sub>2</sub>-high amount (d).

## 1.17 *In situ* DRIFTS spectra of Ni/CeO<sub>2</sub> for CO adsorption

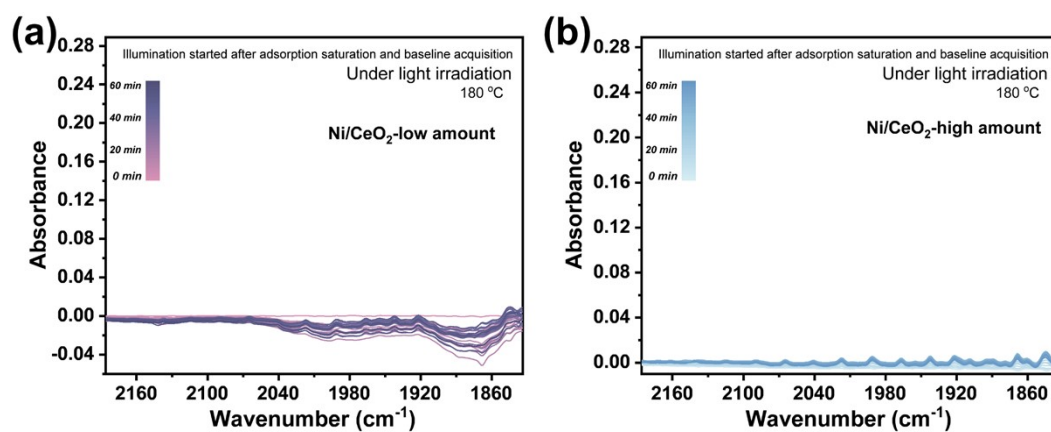

**Figure S17.** *In situ* DRIFTS spectra for CO adsorption under light irradiation during photocatalytic CO<sub>2</sub> reduction with H<sub>2</sub>O. (a) Low Ni/CeO<sub>2</sub> catalyst amount; (b) high Ni/CeO<sub>2</sub> catalyst amount.

## 1.18 Compared with the reported work

**Table S1.** Comparison of CO<sub>2</sub>-to-CH<sub>4</sub> photocatalysis with H<sub>2</sub>O over the past five years.

| Photocatalyst                                            | Light source  | Reaction feedstock                                                                                    | CH <sub>4</sub> evolution rate (μmol·h <sup>-1</sup> ) | CH <sub>4</sub> sel. | Refs.     |
|----------------------------------------------------------|---------------|-------------------------------------------------------------------------------------------------------|--------------------------------------------------------|----------------------|-----------|
| Ni/CeO <sub>2</sub>                                      | 300 W Xe lamp | 200 mg catalysts<br>0.04 MPa CO <sub>2</sub> and 1 mL H <sub>2</sub> O                                | 20.7979                                                | 83.28%               | This work |
| Rb:CABB                                                  | 300 W Xe lamp | 5 mg catalysts<br>CO <sub>2</sub> and 100 μL H <sub>2</sub> O                                         | 0.0145                                                 | 48.60%               | [1]       |
| WO <sub>3</sub> /In <sub>2</sub> O <sub>3</sub>          | 300 W Xe lamp | 50 mg catalysts<br>70 kPa CO <sub>2</sub> and 1 mL H <sub>2</sub> O                                   | 0.0225                                                 | 45%                  | [2]       |
| CuO/NUS-8                                                | 300 W Xe lamp | 3 mg catalysts<br>50 kPa CO <sub>2</sub> and 1 mL H <sub>2</sub> O                                    | 0.0489                                                 | 81.43%               | [3]       |
| Cu-ZnTCPP/g-C <sub>3</sub> N <sub>4</sub>                | 300 W Xe lamp | 5 mg catalysts<br>10% CO <sub>2</sub> 、20% O <sub>2</sub> 、70% Ar and H <sub>2</sub> O                | 0.0565                                                 | 35%                  | [4]       |
| Ni <sub>SA</sub> -NiO <sub>x</sub> /TiO <sub>2</sub>     | 300 W Xe lamp | 5 mg catalysts<br>CO <sub>2</sub> and 1 mL H <sub>2</sub> O                                           | 0.0778                                                 | 87.60%               | [5]       |
| Mg: CdS QDs                                              | 300 W Xe lamp | 2 mg catalysts<br>CO <sub>2</sub> and 4 mL H <sub>2</sub> O、1 mL TEOA                                 | 0.0916                                                 | 88.70%               | [6]       |
| Nb-W <sub>18</sub> O <sub>49</sub>                       | 300 W Xe lamp | 5 mg catalysts<br>0.1 MPa CO <sub>2</sub> and 1 mL H <sub>2</sub> O                                   | 0.1014                                                 | 82.60%               | [7]       |
| Pd/Cu <sub>3</sub> (HITP) <sub>2</sub> /TiO <sub>2</sub> | 300 W Xe lamp | 5 mg catalysts<br>CO <sub>2</sub> and 5 mL H <sub>2</sub> O                                           | 0.1495                                                 | ~100%                | [8]       |
| 60ISIO-3h                                                | 300 W Xe lamp | 10 mg catalysts<br>CO <sub>2</sub> and H <sub>2</sub> O                                               | 0.1652                                                 | 95.93%               | [9]       |
| PDA/Pd <sub>SA</sub> /TiO <sub>2</sub>                   | 300 W Xe lamp | 5 mg catalysts<br>CO <sub>2</sub> (99.999%) and 100 μL H <sub>2</sub> O                               | 0.1864                                                 | 98.13%               | [10]      |
| TiO <sub>2</sub> -V <sub>i</sub>                         | 300 W Xe lamp | 10 mg catalysts<br>101 kPa CO <sub>2</sub> and 1 mL H <sub>2</sub> O                                  | 0.194                                                  | ~100%                | [11]      |
| PW <sub>9</sub> /g-C <sub>3</sub> N <sub>4</sub>         | 300 W Xe lamp | 5 mg catalysts<br>CO <sub>2</sub> (99.99%) and 100 μL H <sub>2</sub> O                                | 0.204                                                  | 80%                  | [12]      |
| Ag/TiO <sub>2</sub>                                      | 300 W Xe lamp | 5 mg catalysts<br>CO <sub>2</sub> and 200 μL H <sub>2</sub> O                                         | 0.23                                                   | 71.43%               | [13]      |
| Co <sub>1</sub> In <sub>1</sub> /CN                      | 300 W Xe lamp | 20 mg catalysts<br>CO <sub>2</sub> and 1 mL H <sub>2</sub> O                                          | 0.376                                                  | 79%                  | [14]      |
| ZnCoO <sub>x</sub> /N-GC                                 | 300 W Xe lamp | 50 mg catalysts<br>CO <sub>2</sub> and H <sub>2</sub> O                                               | 0.38                                                   | 61.30%               | [15]      |
| Co-BS                                                    | 300 W Xe lamp | 25 mg catalysts<br>CO <sub>2</sub> and 1 mL H <sub>2</sub> O                                          | 0.39                                                   | 58.60%               | [16]      |
| Ru-O <sub>v</sub> /TiO <sub>2</sub>                      | 300 W Xe lamp | 10 mg catalysts<br>CO <sub>2</sub> (99.99%) and 500 μL H <sub>2</sub> O                               | 0.501                                                  | 81.00%               | [17]      |
| Cu-SA-CO                                                 | 300 W Xe lamp | 10 mg catalysts<br>0.2 MPa CO <sub>2</sub> and 0.3 mL H <sub>2</sub> O                                | 0.585                                                  | ~100%                | [18]      |
| Bi/TiO <sub>2</sub>                                      | 300 W Xe lamp | 10 mg catalysts<br>CO <sub>2</sub> and 200 μL H <sub>2</sub> O                                        | 0.6023                                                 | 62.11%               | [19]      |
| S-Ti <sub>3</sub> C <sub>2</sub>                         | 300 W Xe lamp | 10 mg catalysts<br>CO <sub>2</sub> and 10 mL H <sub>2</sub> O                                         | 0.6517                                                 | 94.05%               | [20]      |
| CZ <sub>v</sub> 1S                                       | 300 W Xe lamp | 5 mg catalysts<br>70 kPa CO <sub>2</sub> and 10 mL H <sub>2</sub> O                                   | 0.6675                                                 | 85.40%               | [21]      |
| Cu <sub>2</sub> O@NH <sub>2</sub> -CuBTC                 | 300 W Xe lamp | 10 mg catalysts<br>80 kPa CO <sub>2</sub> and 2 mL H <sub>2</sub> O                                   | 0.708                                                  | 98.60%               | [22]      |
| Au/TiO <sub>2</sub> -V <sub>Ti</sub>                     | 300 W Xe lamp | 5 mg catalysts<br>CO <sub>2</sub> and 5 mL H <sub>2</sub> O                                           | 0.7825                                                 | ~100%                | [23]      |
| A-V <sub>o</sub> -SnO <sub>2</sub>                       | 300 W Xe lamp | 50 mg catalysts<br>100 kPa CO <sub>2</sub> and 0.2 mL H <sub>2</sub> O                                | 0.8635                                                 | 93.80%               | [24]      |
| Bi <sub>2</sub> S <sub>3</sub> -SnS <sub>2</sub>         | 300 W Xe lamp | 5 mg catalysts<br>CO <sub>2</sub> and 2 mL H <sub>2</sub> O                                           | 1.707                                                  | 94.60%               | [25]      |
| hS-ZnSe/CdSe                                             | 300 W Xe lamp | 10 mg catalysts<br>CO <sub>2</sub> and 30 mL CH <sub>3</sub> CN、10 mL H <sub>2</sub> O、<br>10 mL TEOA | 2.155                                                  | 92%                  | [26]      |
| Zn/GaN NWs/Si                                            | 300 W Xe lamp | 0.0136 mg catalysts<br>CO <sub>2</sub> and 5 mL H <sub>2</sub> O                                      | 2.57                                                   | 93.60%               | [27]      |
| Pd/ZnO-V <sub>o</sub>                                    | 300 W Xe lamp | 10 mg catalysts<br>CO <sub>2</sub> and 5 mL H <sub>2</sub> O                                          | 2.576                                                  | 95.30%               | [28]      |
| Sn-BMO                                                   | 300 W Xe lamp | 20 mg catalysts<br>CO <sub>2</sub> (99.999%) and 2 mL H <sub>2</sub> O                                | 4.146                                                  | 95.70%               | [29]      |

## 1.19 References

- [1] Z. Chen, X. Jiang, H. Xu, J. Wang, M. Zhang, D. Pan, G. Jiang, M. Z. Shahid and Z. Li, *Small*, **2024**, 20, 2401202.
- [2] Y. He, Z. Yang, J. Yu, D. Xu, C. Liu, Y. Pan, W. Macyk and F. Xu, *Journal of Materials Chemistry A*, **2023**, 11, 14860-14869.
- [3] X. Huang, Z. Wang, Y. Jiang, W. Wen, S. Chen, X. Han, J. Chen, S. Deng and J. Wang, *Chemical Engineering Journal*, **2026**, 527, 171767.
- [4] S. Xie, C. Deng, Q. Huang, C. Zhang, C. Chen, J. Zhao and H. Sheng, *Angewandte Chemie International Edition*, **2023**, 62, e202216717.
- [5] S. Wei, Y. Li, M. Xu, T. Wang, Y. Tu and B. Li, *Journal of Colloid and Interface Science*, **2024**, 683, 731-741.
- [6] J. Liu, Z. Liu, P. Lu, J. Wang, Y. Lu, S. Xu, G. Jiang, S. Li, J. Shao and Z. Li, *Advanced Functional Materials*, **2025**, 36, e09666.
- [7] S. Wei, Y. Li, M. Xu, W. Hu and B. Li, *ACS Applied Materials & Interfaces*, **2025**, 17, 33975-33986.
- [8] W.-h. Bai, Q. Shao, Y.-k. Ji, H. Dong, X.-y. Hu, H.-r. Xiao and C. Long, *Angewandte Chemie International Edition*, **2025**, 64, e202513157.
- [9] K. Lai, Y. Sun, N. Li, Y. Gao, H. Li, L. Ge and T. Ma, *Advanced Functional Materials*, **2024**, 34, 2409031.
- [10] Z. A. Zhao, C. Zhang, J. Shen, C. Gao, Q. Cai, J. Jiang, C. Fu, X. Xu, W. Dai and Z. Zhang, *Advanced Functional Materials*, **2025**, e22529.
- [11] Y. He, S. Dai, J. Sheng, Q. Ren, Y. Lv, Y. Sun and F. Dong, *Proceedings of the National Academy of Sciences*, **2024**, 121, e2322107121.
- [12] Q. Zhu, Z. Li, T. Zheng, X. Zheng, S. Liu, S. Gao, X. Fu, X. Su, Y. Zhu, Y. Zhang and Y. Wei, *Angewandte Chemie International Edition*, **2025**, 64, e202413594.
- [13] C. Ban, Y. Wang, Y. Feng, Z. Zhu, Y. Duan, J. Ma, X. Zhang, X. Liu, K. Zhou, H. Zou, D. Yu, X. Tao, L. Gan, G. Han and X. Zhou, *Energy & Environmental Science*, **2024**, 17, 518-530.
- [14] B. Hu, Z. Li, B. Wang, L. Chen, X. Wang, X. Hu, Z. Bai, Y. Li, G. Chen, X. Luo and S.-F. Yin, *Applied Catalysis B: Environment and Energy*, **2025**, 371, 125196.
- [15] X. Bai, L. He, W. Zhang, T. Yang, F. Lv, Y. Xiong, Z. Zhang and Y. Zhao, *Chemical Engineering Journal*, **2025**, 509, 161312.
- [16] S. She, L. Chen, K. Liao, Y. Fu, J. Wang and X. Wu, *Journal of Colloid and Interface Science*, **2024**, 663, 947-960.
- [17] C. Feng, M. Hu, S. Zuo, J. Luo, P. Castaño, Y. Ren, M. Rueping and H. Zhang, *Advanced Materials*, **2025**, 37, 2411813.

- [18] W. Zhang, C. Deng, W. Wang, H. Sheng and J. Zhao, *Advanced Materials*, **2024**, 36, 2405825.
- [19] J. Meng, K. Wang, Y. Wang, J. Ma, C. Ban, Y. Feng, B. Zhang, K. Zhou, L. Gan, G. Han, D. Yu and X. Zhou, *Nano Research*, **2023**, 17, 1190-1198.
- [20] Y. Chen, X. Lin, W. Li, H. Sun, S. Jia, Y. Zhou, Y. Hao, Z. Liu, S. Yin, C. Guo, Y. Sun, P. Huo, C. Li, Y. H. Ng, J. Crittenden, Z. Zhu and Y. Yan, *Advanced Functional Materials*, **2024**, 34, 2400121.
- [21] Y. Wang, Z. Zhou, Y. Xu, R. Zhao, R. Feng, P. Yu and Y. Liu, *Advanced Functional Materials*, **2025**, 35, 2504435.
- [22] Z. Tang, Y. Wang, J. Xiong, X. Wang, X. Li, J. Wang, Y. Liu, Z. Zhao and Y. Wei, *Applied Catalysis B: Environment and Energy*, **2025**, 381, 125872.
- [23] K. Zheng, B. Li, Y. Zheng, X. Zhang, R. Chen, S. Zhang, S. Liu, J. Zhu, J. Liu, W. Liu, J. Hu, C. Liu, F. Sun, Z. Dai, Y. Sun and Y. Xie, *Advanced Energy Materials*, **2026**, e06793.
- [24] Y. Huo, P. Zhang, J. Chi, F. Fang, Y. Song and D. Sun, *Advanced Energy Materials*, **2024**, 14, 2304282.
- [25] M. Wu, X. Wang, Y. Zheng, P. Lan, A. Hu, J. Zhu, B. Li, Y. Wu, J. Hu, C. Liu, J. Zhu, Y. Pan, M. Zhou, Y. Sun and Y. Xie, *Journal of the American Chemical Society*, **2025**, 147, 45660-45669.
- [26] X. Gao, Z. Zhao, Z. Wu, Z. Yang, K. Guo, J. Han, Y.-H. Ra, X. Kong, J. Zhu and Y. Wang, *Advanced Materials*, **2025**, 38, e14658.
- [27] M. S. Nasir, B. Sheng, Y. Zhao, H. Ye, J. Song, J. Li, P. Wang, T. Wang, X. Wang, Z. Huang and B. Zhou, *Science Bulletin*, **2025**, 70, 373-382.
- [28] K. Zheng, S. Liu, J. Zhu, Z. Dai, C. Liu, B. Li, Y. Zheng, X. Chen, L. Zhai, Y. Wu, W. Liu, M. Fan, J. Hu, Y. Pan, J. Zhu, F. Sun, Y. Sun and Y. Xie, *Angewandte Chemie International Edition*, **2025**, 64, e202508259.
- [29] Q. Liang, J. Fan, X. Deng, J. Liu, J. Zeng, H. Zhang, J. Li, C. Liu, Z. Kang and Z. Zhao, *Angewandte Chemie International Edition*, **2025**, 65, e21874.
